# Supplementary material for: Breath Biopsy® to Identify Exhaled Volatile Organic Compounds Biomarkers for Liver Cirrhosis Detection
Source: PubMed Central journal article supplement — J Clin Transl Hepatol. 2023 Feb 2;11(3):638–48. doi: 10.14218/JCTH.2022.00309 (PMC10037526; doi:10.14218/jcth.2022.00309), 2023-02-02
Supplement: JCTH-11-638-s002.pdf [file JCTH-11-638-s002.pdf]

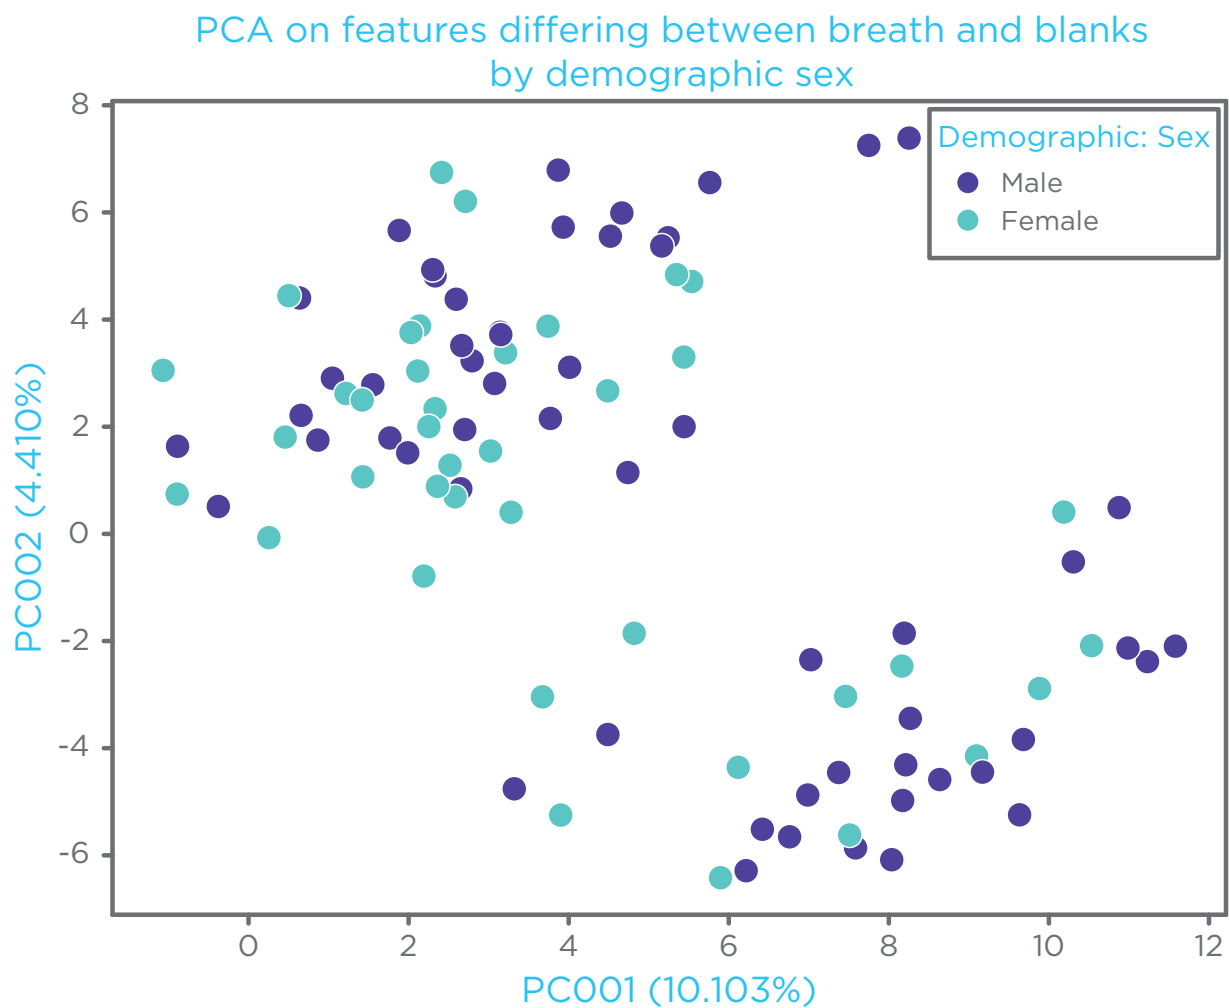

Supplementary Fig. 1. Check for sex-linked differences. PCA dimensionality reduction using on-breath VOCs. Projected data points on the first two principal components were colored by sex. PC1 explains ~10% and PC2 ~7% of the variance. PCA, principal component analysis; VOCs, volatile organic compounds.
