# Supplementary material for: Breath Biopsy® to Identify Exhaled Volatile Organic Compounds Biomarkers for Liver Cirrhosis Detection
Source: PubMed Central journal article supplement — J Clin Transl Hepatol. 2023 Feb 2;11(3):638–48. doi: 10.14218/JCTH.2022.00309 (PMC10037526; doi:10.14218/jcth.2022.00309), 2023-02-02
Supplement: JCTH-11-638-s004.pdf [file JCTH-11-638-s004.pdf]

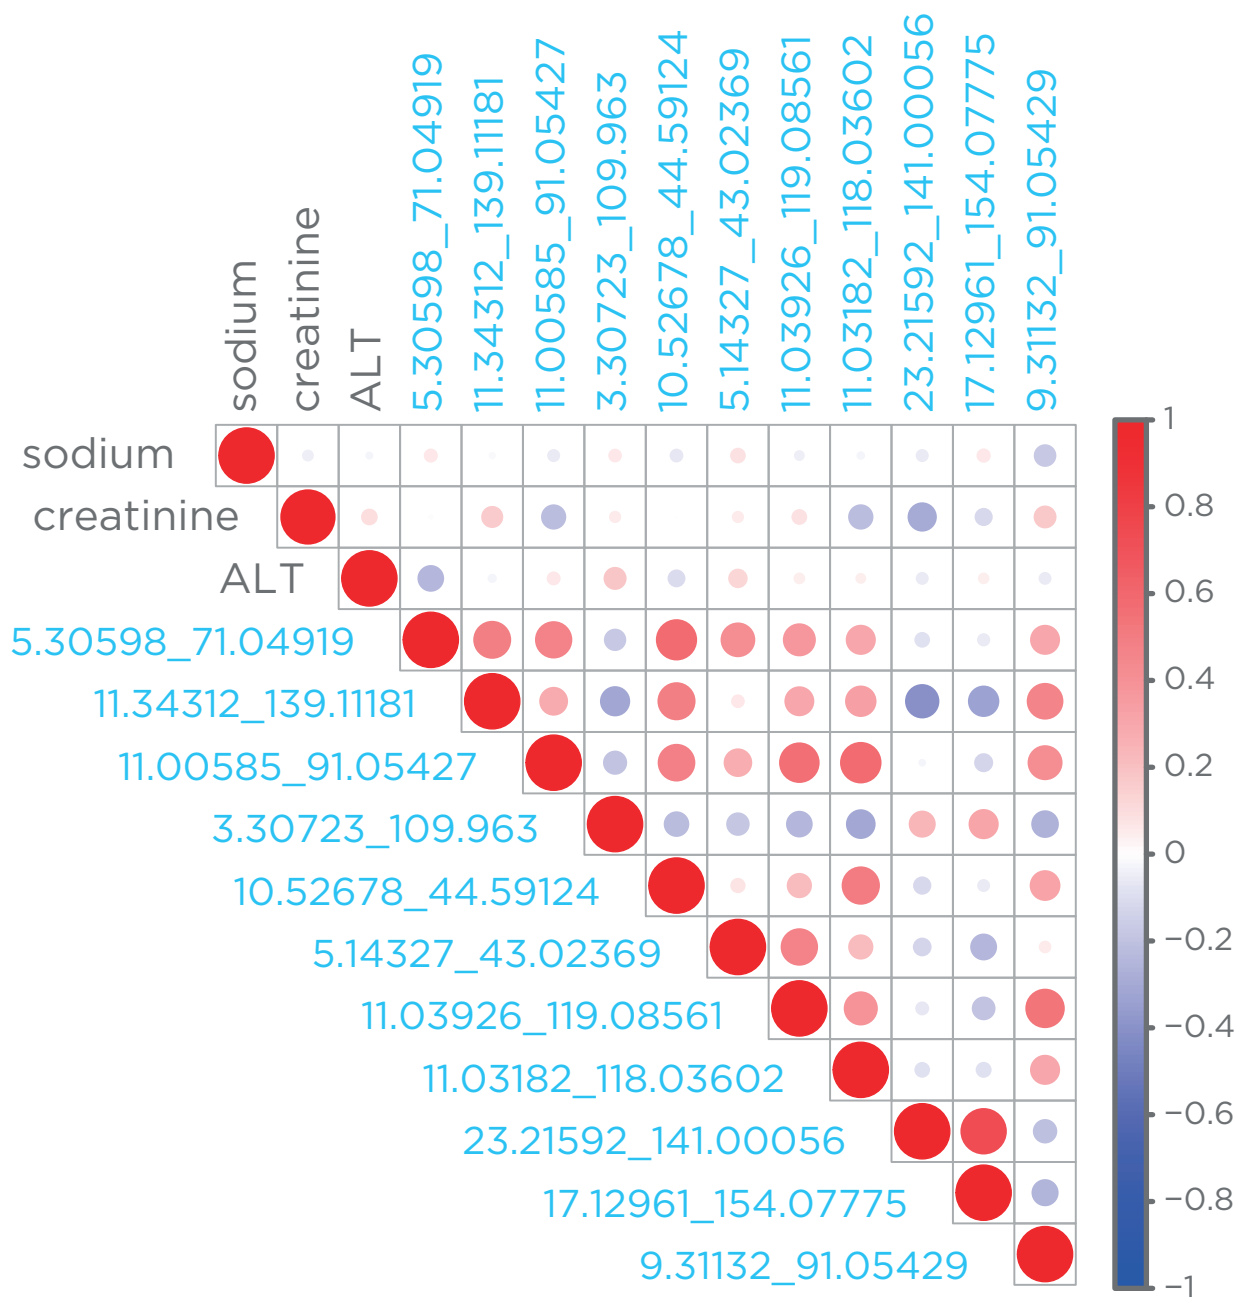

Supplementary Fig. 3. Correlation of breath VOCs with serum ALT, creatinine, and sodium in cirrhosis subjects. Blue indicates a negative and red a positive correlation. Circle size and intensity of color show the magnitude of the correlation. ALT, alanine aminotransferase; VOCs, volatile organic compounds.
